# Supplementary material
Source: publisher figshare collection journal article supplement (https://asha.figshare.com/articles/dataset/_/6170459)
Supplement: Supplementary file 1 [file 1]

**Audio 1.** Audio file for fully symmetric model settings.

**Video 1.** Movie of vocal fold surface vibration with fully symmetric model settings. Note that, for clarity, the vocal fold surfaces were prevented from crossing midline in these videos. This restriction was only for the purposes of illustration; the surfaces were allowed to cross midline in all simulations.

**Audio 2.** Audio file for most asymmetric adduction, with all other parameters symmetric: Right  $\xi_{02} = 0.1$  cm, Left  $\xi_{02} = 0.4$  cm.

**Video 2.** Movie of vocal fold surface vibration at most asymmetric adduction, with all other parameters symmetric: Right  $\xi_{02} = 0.1$  cm, Left  $\xi_{02} = 0.4$  cm.

**Audio 3.** Audio file for most asymmetric bulging, with all other parameters symmetric: Right  $\xi_b = 0.1$  cm, Left  $\xi_b = -0.1$  cm.

**Video 3.** Movie of vocal fold surface vibration at most asymmetric bulging, with all other parameters symmetric: Right  $\xi_b = 0.1$  cm, Left  $\xi_b = -0.1$  cm.

**Audio 4.** Audio file for most asymmetric nodal point ratio, with all other parameters symmetric: Right  $R_{zn} = 0.8$ , Left  $R_{zn} = 0.1$ .

**Video 4.** Movie of vocal fold surface vibration at most asymmetric nodal point ratio, with all other parameters symmetric: Right  $R_{zn} = 0.8$ , Left  $R_{zn} = 0.1$ .

**Audio 5.** Audio file for most asymmetric amplitude of vibration, with all other parameters symmetric:  $Asym = 0$ .

**Video 5.** Movie of vocal fold surface vibration at most asymmetric amplitude of vibration, with all other parameters symmetric:  $Asym = 0$ .

**Audio 6.** Audio file for most asymmetric starting phase, with all other parameters symmetric: Right  $\phi = 0$  radians, Left  $\phi = 2.4$  radians.

**Video 6.** Movie of vocal fold surface vibration at most asymmetric starting phase, with all other parameters symmetric: Right  $\phi = 0$  radians, Left  $\phi = 2.4$  radians.
